# Supplementary material for: Syntheses, structures and luminescence properties of three metal–organic frameworks based on 5-(4-(2H-tetrazol-5-yl)phenoxy)isophthalic acid
Source: Royal Society of Chemistry journal article supplement (doi:10.1039/c3ce41764f), 2013-10-30
Supplement: c3ce41764f.pdf [file c3ce41764f.pdf]

## Supporting Information

Syntheses, structures and luminescence properties of three metal–organic frameworks based on 5-(4-(2H-tetrazol-5-yl)phenoxy)isophthalic acid

Hongming He,<sup>a</sup> Fuxing Sun,<sup>a\*</sup> Hongmin Su,<sup>a</sup> Jiangtao Jia,<sup>a</sup> and Guangshan Zhu<sup>a,b\*</sup>

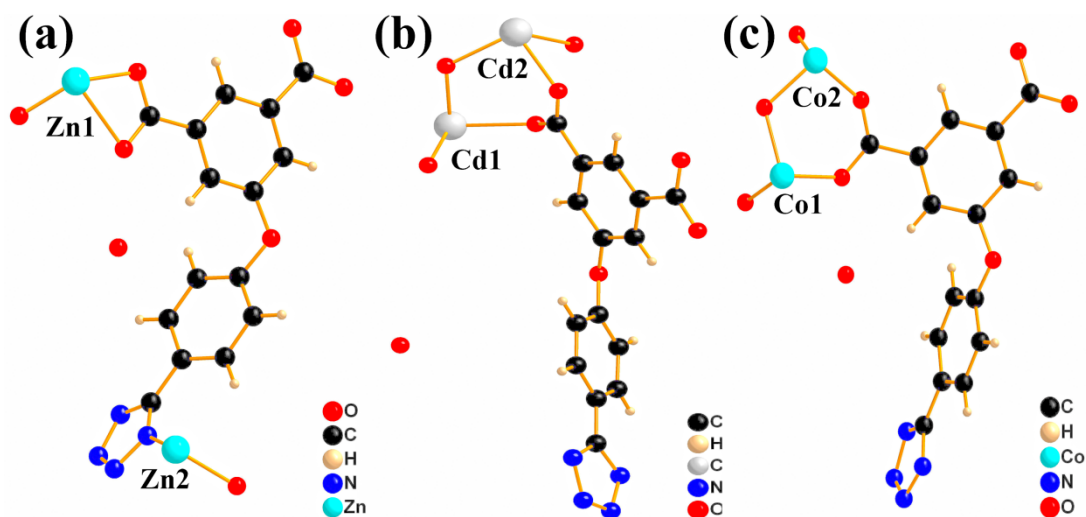

Fig. S1 The asymmetric unit of JUC-114, JUC-115 and JUC-116.

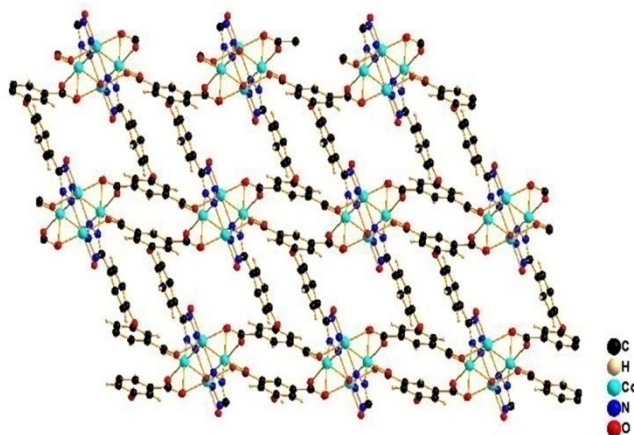

Fig. S2 View of 3D coordination framework along the a-axis of JUC-116.

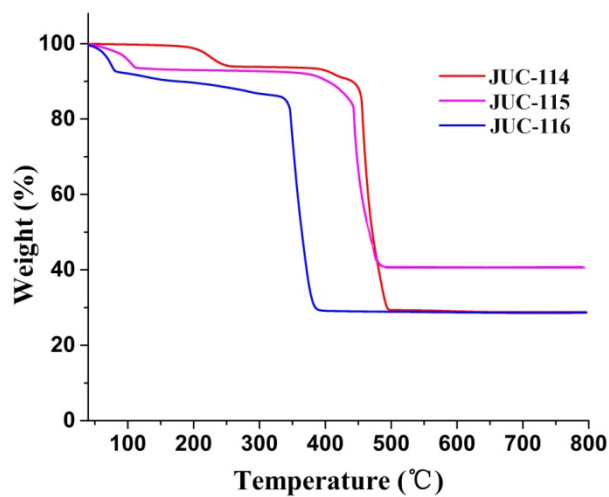

Fig. S3 The TGA curves of JUC-114, JUC-115 and JUC-116.

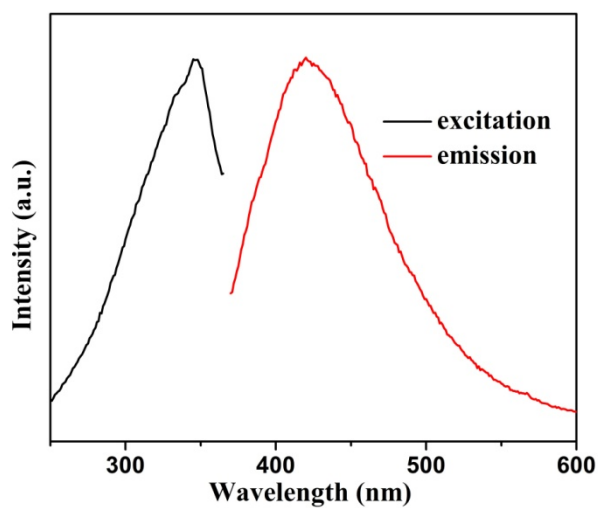

Fig. S4 Excitation (black line) and emission (red line) spectra of free H<sub>3</sub>TPIA ligand.

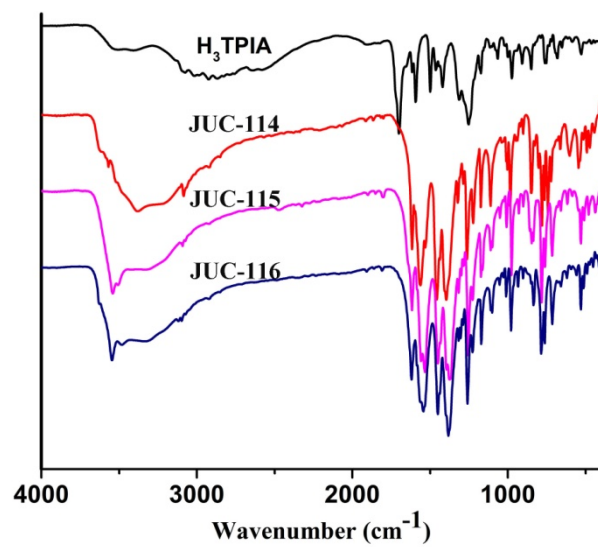

Fig. S5 IR spectra of H<sub>3</sub>TPIA and JUC-114, JUC-115 and JUC-116.

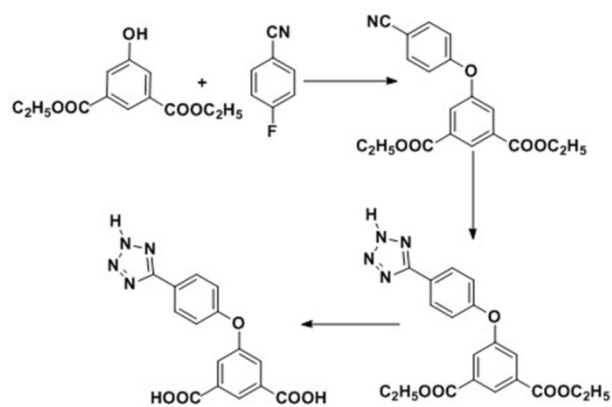

Scheme S1 The synthetic route of H<sub>3</sub>TPIA.

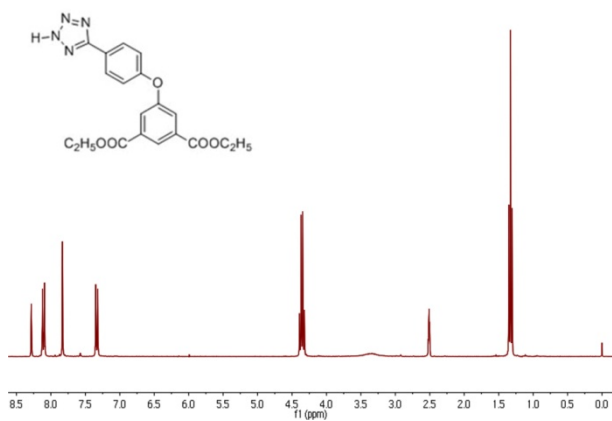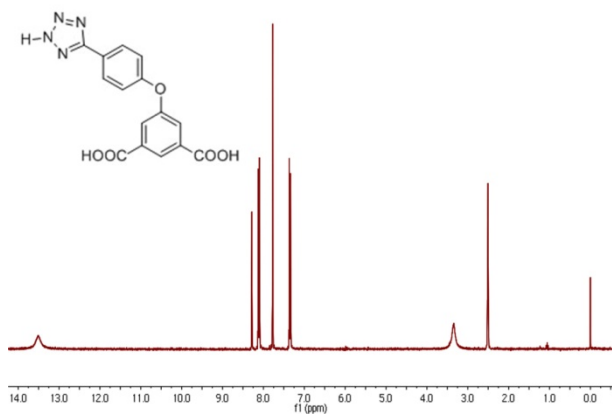

Fig. S6 The <sup>1</sup>H NMR spectra of the ligand.

**Table S1. Selected bond lengths (Å) and angles (deg) for JUC-114, JUC-115 and JUC-116.**

| <b>JUC-114</b>                                              |            |                     |              |
|-------------------------------------------------------------|------------|---------------------|--------------|
| N(1)-Zn(1)#1                                                | 2.027(3)   | N(4)-Zn(2)          | 2.018(3)     |
| O(1)-Zn(2)#2                                                | 1.887(3)   | O(1)-Zn(1)          | 1.918(3)     |
| O(2)-Zn(1)                                                  | 2.366(3)   | O(3)-Zn(1)          | 1.993(3)     |
| O(4)-Zn(1)#3                                                | 2.004(2)   | O(5)-Zn(2)#4        | 1.952(3)     |
| O(7)-Zn(2)                                                  | 2.003(3)   | Zn(1)-O(4)#3        | 2.005(2)     |
| Zn(1)-N(1)#5                                                | 2.027(3)   | Zn(2)-O(1)#6        | 1.887(3)     |
| Zn(2)-O(5)#7                                                | 1.952(3)   |                     |              |
| O(1)-Zn(1)-O(4)#3                                           | 95.57(12)  | O(1)-Zn(1)-O(3)     | 126.15(13)   |
| O(1)-Zn(1)-N(1)#5                                           | 109.42(14) | O(3)-Zn(1)-O(4)#3   | 104.72(11)   |
| O(4)#3-Zn(1)-N(1)#5                                         | 103.30(12) | O(3)-Zn(1)-N(1)#5   | 113.30(12)   |
| O(3)-Zn(1)-O(2)                                             | 59.25(10)  | O(1)-Zn(1)-O(2)     | 88.87(11)    |
| N(1)#5-Zn(1)-O(2)                                           | 91.65(12)  | O(4)#3-Zn(1)-O(2)   | 161.90(11)   |
| O(1)#6-Zn(2)-O(7)                                           | 108.23(12) | O(1)#6-Zn(2)-O(5)#7 | 118.02(14)   |
| O(1)#6-Zn(2)-N(4)                                           | 119.15(14) | O(5)#7-Zn(2)-O(7)   | 101.69(11)   |
| O(7)-Zn(2)-N(4)                                             | 103.02(13) | O(5)#7-Zn(2)-N(4)   | 104.41(12)   |
| Symmetry transformations used to generate equivalent atoms: |            |                     |              |
| #1 x-1,y+1,z                                                | #2 x,y-1,z | #3 -x+1,-y-1,-z+1   | #4 x,y-1,z+1 |
| #5 x+1,y-1,z                                                | #6 x,y+1,z | #7 x,y+1,z-1        |              |
| <b>JUC-115</b>                                              |            |                     |              |
| Cd(1)-O(7)                                                  | 2.237(2)   | Cd(1)-O(4)#1        | 2.274(3)     |
| Cd(1)-O(6)                                                  | 2.326(3)   | Cd(1)-N(2)#2        | 2.340(3)     |
| Cd(1)-O(1)                                                  | 2.376(3)   | Cd(1)-N(3)#3        | 2.389(3)     |
| O(7)-Cd(2)#4                                                | 2.243(2)   | Cd(2)-O(2)          | 2.205(3)     |
| Cd(2)-O(3)#5                                                | 2.234(3)   | Cd(2)-O(7)#4        | 2.243(2)     |
| Cd(2)-O(7)                                                  | 2.274(2)   | Cd(2)-N(4)#6        | 2.383(3)     |
| Cd(2)-O(8)                                                  | 2.768(4)   | N(2)-Cd(1)#2        | 2.340(3)     |
| N(3)-Cd(1)#7                                                | 2.389(3)   | N(4)-Cd(2)#6        | 2.383(3)     |
| O(3)-Cd(2)#5                                                | 2.234(3)   | O(4)-Cd(1)#8        | 2.274(3)     |
| O(7)-Cd(1)-O(4)#1                                           | 99.99(10)  | O(7)-Cd(1)-O(6)     | 88.32(11)    |

|                     |            |                     |            |
|---------------------|------------|---------------------|------------|
| O(4)#1-Cd(1)-O(6)   | 95.49(13)  | O(7)-Cd(1)-N(2)#2   | 164.82(10) |
| O(4)#1-Cd(1)-N(2)#2 | 93.73(11)  | O(6)-Cd(1)-N(2)#2   | 83.91(12)  |
| O(7)-Cd(1)-O(1)     | 83.43(9)   | O(4)#1-Cd(1)-O(1)   | 171.29(11) |
| O(6)-Cd(1)-O(1)     | 92.60(13)  | N(2)#2-Cd(1)-O(1)   | 83.92(10)  |
| O(7)-Cd(1)-N(3)#3   | 88.70(10)  | O(4)#1-Cd(1)-N(3)#3 | 86.87(11)  |
| O(6)-Cd(1)-N(3)#3   | 176.48(12) | N(2)#2-Cd(1)-N(3)#3 | 98.57(10)  |
| O(1)-Cd(1)-N(3)#3   | 85.20(10)  | O(2)-Cd(2)-O(3)#5   | 91.66(10)  |
| O(2)-Cd(2)-O(7)#4   | 156.38(10) | O(3)#5-Cd(2)-O(7)#4 | 89.18(10)  |
| O(2)-Cd(2)-O(7)     | 97.26(10)  | O(3)#5-Cd(2)-O(7)   | 171.08(10) |
| O(7)#4-Cd(2)-O(7)   | 82.77(9)   | O(2)-Cd(2)-N(4)#6   | 112.58(10) |
| O(3)#5-Cd(2)-N(4)#6 | 87.19(11)  | O(7)#4-Cd(2)-N(4)#6 | 91.03(10)  |

Symmetry transformations used to generate equivalent atoms:

#1 x,y,z-1    #2 -x+1,-y+1,-z+1    #3 x-1,y-1,z-1    #4 -x,-y-1,-z    #5 -x,-y-1,-z+1    #6 -x+1,-y,-z+1    #7  
 x+1,y+1,z+1    #8 x,y,z+1

**JUC-116**

|                     |            |                   |            |
|---------------------|------------|-------------------|------------|
| Co(1)-O(2)          | 2.080(5)   | Co(1)-O(4)        | 2.093(5)   |
| Co(1)-O(6)#1        | 2.146(5)   | Co(1)-N(3)#2      | 2.163(5)   |
| Co(1)-O(1)          | 2.196(5)   | Co(1)-N(2)#3      | 2.205(6)   |
| Co(2)-O(3)          | 2.019(5)   | Co(2)-O(5)#4      | 2.073(5)   |
| Co(2)-O(2)          | 2.080(4)   | Co(2)-O(2)#5      | 2.123(4)   |
| Co(2)-N(4)#2        | 8 2.230(5) | N(2)-Co(1)#3      | 2.204(6)   |
| N(3)-Co(1)#6        | 2.163(5)   | N(4)-Co(2)#6      | 2.230(5)   |
| O(2)-Co(2)#5        | 2.123(4)   | O(5)-Co(2)#4      | 2.073(4)   |
| O(6)-Co(1)#7        | 2.146(5)   | O(2)-Co(1)-O(4)   | 96.42(15)  |
| O(2)-Co(1)-O(6)#1   | 88.26(14)  | O(4)-Co(1)-O(6)#1 | 174.80(14) |
| O(2)-Co(1)-N(3)#2   | 88.28(15)  | O(4)-Co(1)-N(3)#2 | 88.2(2)    |
| O(6)#1-Co(1)-N(3)#2 | 89.7(2)    | O(2)-Co(1)-O(1)   | 88.42(15)  |
| O(4)-Co(1)-O(1)     | 92.5(2)    | O(6)#1-Co(1)-O(1) | 89.9(2)    |
| N(3)#2-Co(1)-O(1)   | 176.68(14) | O(2)-Co(1)-N(2)#3 | 168.91(15) |

---

|                     |            |                     |            |
|---------------------|------------|---------------------|------------|
| O(4)-Co(1)-N(2)#3   | 91.81(17)  | O(6)#1-Co(1)-N(2)#3 | 83.85(17)  |
| N(3)#2-Co(1)-N(2)#3 | 99.43(15)  | O(1)-Co(1)-N(2)#3   | 83.80(15)  |
| O(3)-Co(2)-O(5)#4   | 89.7(2)    | O(3)-Co(2)-O(2)     | 93.89(19)  |
| O(5)#4-Co(2)-O(2)   | 162.04(14) | O(3)-Co(2)-O(2)#5   | 177.17(14) |
| O(5)#4-Co(2)-O(2)#5 | 92.77(19)  | O(2)-Co(2)-O(2)#5   | 83.32(19)  |
| O(3)-Co(2)-N(4)#2   | 89.7(2)    | O(5)#4-Co(2)-N(4)#2 | 108.10(17) |
| O(2)-Co(2)-N(4)#2   | 89.52(16)  | O(2)#5-Co(2)-N(4)#2 | 90.72(19)  |

Symmetry transformations used to generate equivalent atoms:

#1 x,y,z-1 #2 x+1,y+1,z #3 -x,-y,-z #4 -x+2,-y+1,-z+1 #5 -x+2,-y+1,-z #6 x-1,y-1,z #7 x,y,z+1

---
